# Supplementary material
Source: PubMed Central journal article supplement (PMC5180463)
Supplement: DC160455SupplementaryData.pdf [file DC160455SupplementaryData.pdf]

SUPPLEMENTARY DATA

**Supplementary Figure S1.** Temporal patterns of total adiponectin in the three race/ethnicity groups with the three treatment groups combined\*

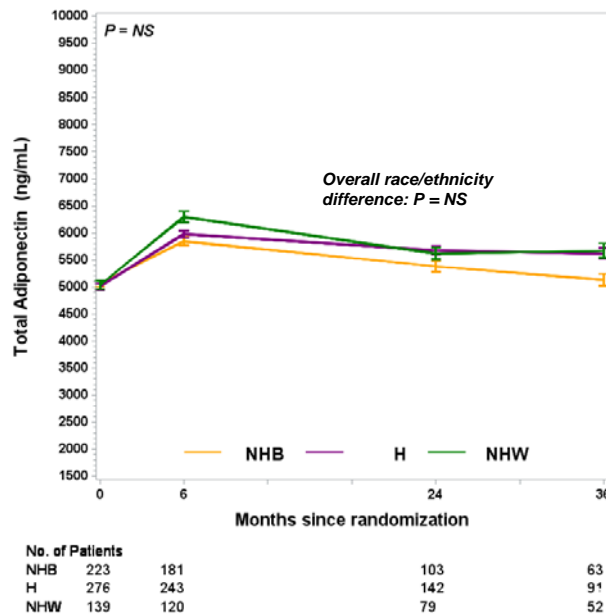

\* Baseline adjusted geometric mean  $\pm$  SE asymmetric limits (obtained as  $\exp[\text{mean} \pm \text{SE of log values}]$  of total adiponectin measures in the three racial/ethnic groups [NHB: non-Hispanic black; H: Hispanic; NHW: non-Hispanic white] over 36 months of follow-up in TODAY, analyzed using log transformed values. The P-value refers to the overall effect of race/ethnicity in the longitudinal models, adjusted for the baseline value of the outcome, sex, baseline BMI, age at randomization, medication adherence, and treatment group.

SUPPLEMENTARY DATA

**Supplementary Table S1.** Model-adjusted means and changes in insulin sensitivity, C-peptide index, C-peptide oDI, total adiponectin, and high molecular weight adiponectin (HMWA) in the three race/ethnicity groups over 36 months of follow-up in TODAY, based on longitudinal adjusted models\*

|                                          | NHB<br>(n=227)          | H<br>(n=278)            | NHW<br>(n=142)          | P-value  |
|------------------------------------------|-------------------------|-------------------------|-------------------------|----------|
| <b>Insulin sensitivity (mL/μU)</b>       |                         |                         |                         |          |
| <b>Absolute mean</b>                     |                         |                         |                         |          |
| Baseline                                 | 0.039 (0.037, 0.040)    | 0.039 (0.038, 0.041)    | 0.040 (0.038, 0.041)    | † P = ns |
| 6 month                                  | 0.040 (0.039, 0.041)    | 0.040 (0.039, 0.041)    | 0.043 (0.041, 0.045)    |          |
| 24 month                                 | 0.043 (0.041, 0.045)    | 0.041 (0.040, 0.043)    | 0.041 (0.039, 0.043)    |          |
| 36 month                                 | 0.042 (0.039, 0.044)    | 0.041 (0.039, 0.043)    | 0.039 (0.037, 0.042)    |          |
| <b>Percent change</b>                    |                         |                         |                         |          |
| 0-6 month change (%)                     | +2.9 (-1.3, 7.3)        | +1.4 (-2.2, 5.1)        | +8.0 (2.6, 13.7)        | ‡ P = ns |
| 6-36 month rate of change (%/yr)         | +3.5 (-0.9, 8.1)        | +1.8 (-1.9, 5.6)        | -6.2 (-10.8, -1.4)      | ‡ P = ns |
| <b>C-peptide index (ng/mL per mg/dL)</b> |                         |                         |                         |          |
| <b>Absolute mean</b>                     |                         |                         |                         |          |
| Baseline                                 | 0.063 (0.060, 0.066)    | 0.062 (0.060, 0.065)    | 0.061 (0.057, 0.064)    | † P = ns |
| 6 month                                  | 0.052 (0.049, 0.054)    | 0.053 (0.051, 0.055)    | 0.055 (0.052, 0.058)    |          |
| 24 month                                 | 0.040 (0.038, 0.042)    | 0.043 (0.041, 0.045)    | 0.043 (0.040, 0.045)    |          |
| 36 month                                 | 0.043 (0.040, 0.046)    | 0.044 (0.041, 0.046)    | 0.043 (0.040, 0.047)    |          |
| <b>Percent change</b>                    |                         |                         |                         |          |
| 0-6 month change (%)                     | -17.8 (-22.3, -13.1)    | -15.6 (-19.5, -11.5)    | -9.6 (-15.6, -3.1)      | ‡ P = ns |
| 6-36 month rate of change (%/yr)         | -13.4 (-18.3, -8.1)     | -13.3, (-17.5, -9.0)    | -16.6 (-21.9, -10.8)    | ‡ P = ns |
| <b>oDI (mL/μU * ng/mL per mg/dL)</b>     |                         |                         |                         |          |
| <b>Absolute mean</b>                     |                         |                         |                         |          |
| Baseline                                 | 0.0025 (0.0023, 0.0026) | 0.0024 (0.0023, 0.0026) | 0.0024 (0.0022, 0.0026) | † P = ns |
| 6 month                                  | 0.0021 (0.0020, 0.0022) | 0.0022 (0.0020, 0.0023) | 0.0024 (0.0022, 0.0025) |          |
| 24 month                                 | 0.0017 (0.0016, 0.0019) | 0.0018 (0.0017, 0.0019) | 0.0017 (0.0016, 0.0019) |          |

SUPPLEMENTARY DATA

**Supplementary Table S1.** Model-adjusted means and changes in insulin sensitivity, C-peptide index, C-peptide oDI, total adiponectin, and high molecular weight adiponectin (HMWA) in the three race/ethnicity groups over 36 months of follow-up in TODAY, based on longitudinal adjusted models\*

|                                  | NHB<br>(n=227)          | H<br>(n=278)            | NHW<br>(n=142)          | P-value                                    |
|----------------------------------|-------------------------|-------------------------|-------------------------|--------------------------------------------|
| 36 month                         | 0.0019 (0.0017, 0.0021) | 0.0018 (0.0017, 0.0020) | 0.0017 (0.0015, 0.0019) |                                            |
| <b>Percent change</b>            |                         |                         |                         |                                            |
| 0-6 month change (%)             | -15.1 (-21.3, -8.3)     | -11.9 (-17.4, -6.0)     | -1.0 (-9.7, 8.6)        | ‡ P = ns                                   |
| 6-36 month rate of change (%/yr) | -8.6 (-15.6, -0.9)      | -11.6 (-17.3, -5.6)     | -22.3 (-29.0, -15.0)    | ‡ P = ns                                   |
| <b>Total Adiponectin (ng/mL)</b> |                         |                         |                         |                                            |
| <b>Absolute mean</b>             |                         |                         |                         |                                            |
| Baseline                         | 5062 (4954, 5171)       | 5007 (4915, 5101)       | 5034 (4903, 5169)       | † P = ns                                   |
| 6 month                          | 5844 (5712, 5978)       | 5976 (5862, 6093)       | 6294 (6123, 6470)       |                                            |
| 24 month                         | 5377 (5221, 5539)       | 5671 (5533, 5813)       | 5617 (5433, 5808)       |                                            |
| 36 month                         | 5132 (4942, 5329)       | 5618 (5447, 5795)       | 5666 (5439, 5902)       |                                            |
| <b>Percent change</b>            |                         |                         |                         |                                            |
| 0-6 month change (%)             | +15.4 (12.5, 18.5)      | +19.3 (16.7, 22.0)      | +25.0 (21.1, 29.1)      | ‡ NHB vs H p=0.0376                        |
| 6-36 month rate of change (%/yr) | -8.9 (-11.5, -6.2)      | -4.4 (-6.7, -2.1)       | -7.6 (-10.6, -4.6)      | ‡ P = ns                                   |
| <b>HMWA (ng/mL)</b>              |                         |                         |                         |                                            |
| <b>Absolute mean</b>             |                         |                         |                         |                                            |
| Baseline                         | 2357 (2288, 2427)       | 2338 (2279, 2398)       | 2367 (2283, 2455)       | † P = 0.0104                               |
| 6 month                          | 2764 (2679, 2852)       | 3038 (2958, 3119)       | 3166 (3048, 3288)       |                                            |
| 24 month                         | 2616 (2512, 2724)       | 2956 (2858, 3058)       | 2788 (2663, 2919)       |                                            |
| 36 month                         | 2540 (2412, 2675)       | 2918 (2797, 3045)       | 2944 (2784, 3114)       |                                            |
| <b>Percent change</b>            |                         |                         |                         |                                            |
| 0-6 month change (%)             | +17.3 (13.2, 21.5)      | +29.9 (26.0, 33.9)      | +33.7 (28.0, 39.7)      | ‡ NHB vs H p=0.0281<br>NHB vs NHW p=0.0190 |
| 6-36 month rate of change (%/yr) | -5.9 (-9.5, 2.0)        | -2.8 (-6.0, 0.5)        | -5.8 (-9.9, 1.4)        | ‡ P = ns                                   |

## SUPPLEMENTARY DATA

\* Data presented are model-adjusted geometric means (95% CI) at baseline, month 6, 24, and 36, model-adjusted 0-6 month mean percent change (95% CI), and model-adjusted 6-36 month mean percent annual rate of change (95% CI) in the three racial/ethnic groups [NHB: non-Hispanic black; H: Hispanic; NHW: non-Hispanic white]. Because these are model adjusted data the baseline numbers are different from the raw data in table 1.

† Overall P-value refers to the effect of race/ethnicity over time from longitudinal models, adjusted for the baseline value of the outcome, sex, baseline BMI, age at randomization, medication adherence, and treatment group. Variables were log-transformed prior to testing.

‡ P-values evaluating differences by race/ethnicity in the 0-6 month percent change and in the 6-36 month mean rate of change, from models adjusted for the baseline value of the outcome, sex, baseline BMI, age at randomization, medication adherence, and treatment group. Variables were log-transformed prior to testing.

SUPPLEMENTARY DATA

**Supplementary Figure S2.** Temporal patterns of total adiponectin and high molecular weight adiponectin (HMWA) in the three treatment groups with the three race/ethnic groups combined (Figure S2A-B)\*

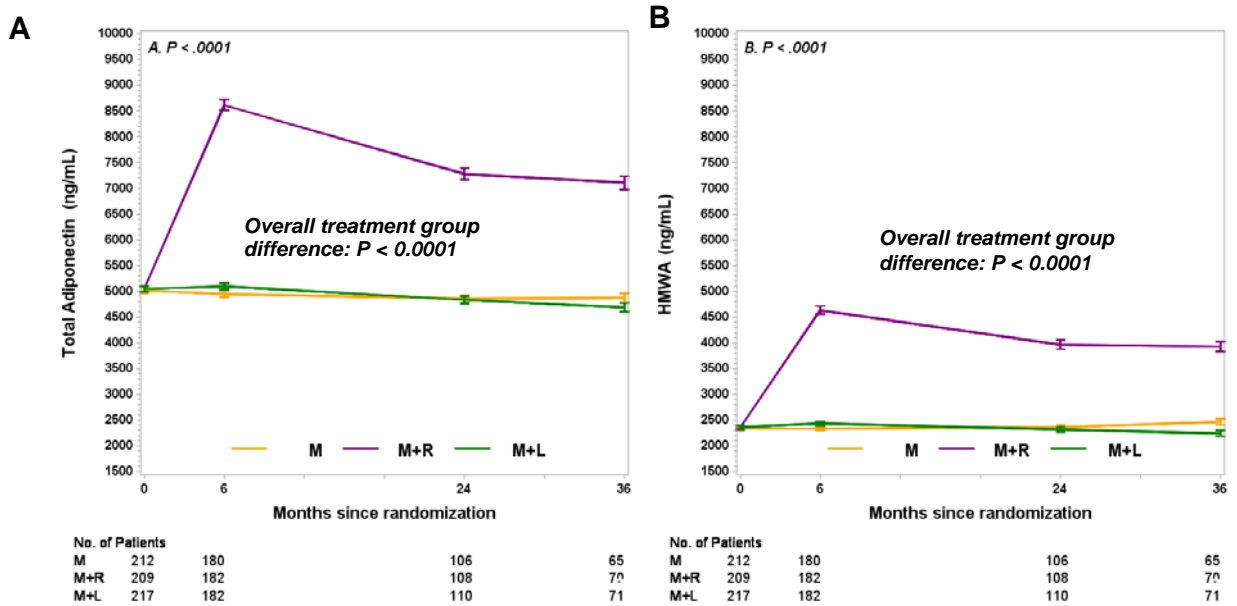

\* Baseline adjusted geometric mean  $\pm$  SE asymmetric limits (obtained as  $\exp[\text{mean} \pm \text{SE of log values}]$  of measures of total adiponectin (A) and HMWA (B) in the three treatment groups [M: metformin only; M+R: metformin+rosiglitazone; M+L: metformin+intensive lifestyle] over 36 months of follow-up in TODAY, analyzed using log transformed values. The P-value refers to the overall effect of treatment group in the longitudinal models, adjusted for the baseline value of the outcome, sex, baseline BMI, age at randomization, medication adherence, and race/ethnicity.

SUPPLEMENTARY DATA

**Supplementary Table S2.** Model-adjusted means and changes in total adiponectin and high molecular weight adiponectin (HMWA) in the three treatment groups over 36 months of follow-up in TODAY, based on longitudinal adjusted models\*

|                                  | Metformin only<br>(M, n=217) | Metformin +<br>rosiglitazone<br>(M+R, n=212) | Metformin +<br>intensive lifestyle<br>(M+L, n=218) | P-value                                    |
|----------------------------------|------------------------------|----------------------------------------------|----------------------------------------------------|--------------------------------------------|
| <b>Total Adiponectin (ng/mL)</b> |                              |                                              |                                                    |                                            |
| <b>Absolute mean</b>             |                              |                                              |                                                    |                                            |
| Baseline                         | 5015 (4917, 5116)            | 5046 (4945, 5148)                            | 5048 (4950, 5148)                                  | † P < .0001                                |
| 6 month                          | 4949 (4847, 5054)            | 8620 (8442, 8802)                            | 5095 (4992, 5201)                                  |                                            |
| 24 month                         | 4853 (4727, 4983)            | 7283 (7095, 7476)                            | 4835 (4713, 4961)                                  |                                            |
| 36 month                         | 4873 (4712, 5040)            | 7107 (6881, 7340)                            | 4686 (4539, 4838)                                  |                                            |
| <b>Percent change</b>            |                              |                                              |                                                    |                                            |
| 0-6 month change (%)             | -1.3 (-3.5, 0.9)             | +70.8 (67.0, 74.7)                           | +0.9 (-1.3, 3.2)                                   | ‡ M+R vs M p<.0001<br>M+R vs M+L p<.0001   |
| 6-36 month rate of change (%/yr) | -1.2 (-3.7, 1.4)             | -13.3 (-15.4, -11.1)                         | -5.8 (-8.1, -3.4)                                  | ‡ M+R vs M p=0.0003<br>M+R vs M+L p=0.0197 |
| <b>HMWA (ng/mL)</b>              |                              |                                              |                                                    |                                            |
| <b>Absolute mean</b>             |                              |                                              |                                                    |                                            |
| Baseline                         | 2339 (2275, 2404)            | 2350 (2285, 2417)                            | 2362 (2299, 2428)                                  | † P < .0001                                |
| 6 month                          | 2331 (2264, 2400)            | 4634 (4502, 4771)                            | 2435 (2366, 2506)                                  |                                            |
| 24 month                         | 2364 (2278, 2452)            | 3966 (3824, 4113)                            | 2319 (2237, 2403)                                  |                                            |
| 36 month                         | 2463 (2350, 2581)            | 3926 (3752, 4107)                            | 2241 (2143, 2343)                                  |                                            |
| <b>Percent change</b>            |                              |                                              |                                                    |                                            |
| 0-6 month change (%)             | -0.3 (-3.4, 2.9)             | +97.2 (91.1, 103.5)                          | +3.1 (-0.1, 6.4)                                   | ‡ M+R vs M p<.0001<br>M+R vs M+L p<.0001   |
| 6-36 month rate of change (%/yr) | +3.8 (0.1, 7.6)              | -11.6 (-14.7, -8.5)                          | -5.7 (-9.0, -2.4)                                  | ‡ M+R vs M p=0.0015                        |

## SUPPLEMENTARY DATA

\* Data presented are model-adjusted geometric means (95% CI) at baseline, month 6, 24, and 36, and model-adjusted 0-6 month mean percent change (95% CI), and model-adjusted 6-36 month mean percent annual rate of change (95% CI) in the three treatment groups [M: metformin only; M+R: metformin+rosiglitazone; M+L: metformin+intensive lifestyle].

† Overall P-value refers to the effect of treatment group over time from longitudinal models, adjusted for the baseline value of the outcome, sex, baseline BMI, age at randomization, medication adherence, and race/ethnicity. Variables were log-transformed prior to testing.

‡ P-values evaluating differences by treatment group in the 0-6 month percent change and in the 6-36 month mean rate of change, from models adjusted for the baseline value of the outcome, sex, baseline BMI, age at randomization, medication adherence, and race/ethnicity. Variables were log-transformed prior to testing.

SUPPLEMENTARY DATA

**Supplementary Table S3.** Demographic and metabolic characteristics of TODAY participants at baseline by race/ethnicity and by those who failed versus those who did not fail treatment (primary outcome reached yes/no)\*

|                                                                                   | Failed                   | Did Not Fail             | Unadjusted P-value <sup>†</sup> | Adjusted P-value <sup>†</sup> |
|-----------------------------------------------------------------------------------|--------------------------|--------------------------|---------------------------------|-------------------------------|
| <b>Non-Hispanic black</b>                                                         | <b>n=120</b>             | <b>n=107</b>             |                                 |                               |
| Age at randomization (yr)                                                         | 13.8 ± 2.0               | 14.0 ± 1.9               | ns                              | -                             |
| Female (%)                                                                        | 68.3%                    | 71.0%                    | ns                              | -                             |
| Months since diagnosis                                                            | 6 (4,11)                 | 6 (4,9)                  | ns                              | -                             |
| BMI (kg/m <sup>2</sup> )                                                          | 36.1 ± 7.9               | 37.0 ± 8.3               | ns                              | -                             |
| BMI Z-score                                                                       | 2.30 ± 0.43              | 2.35 ± 0.38              | ns                              | -                             |
| Waist circumference (cm)                                                          | 109.5 ± 16.6             | 113.4 ± 18.2             | ns                              | -                             |
| HbA1c (%)                                                                         | 6.5 ± 0.7                | 5.9 ± 0.6                | <.0001                          | <.0001                        |
| Fasting glucose (mg/dL)                                                           | 121.6 ± 27.1             | 100.5 ± 18.3             | <.0001                          | <.0001                        |
| Fasting insulin (μU/mL) <sup>‡</sup>                                              | 36.8 ± 24.1              | 31.7 ± 23.1              | 0.0257                          | 0.0082                        |
| Fasting C-peptide (ng/mL) <sup>‡</sup>                                            | 3.9 ± 1.6                | 3.5 ± 1.5                | ns                              | 0.0118                        |
| Insulin sensitivity [1/I <sub>F</sub> ] (mL/μU) <sup>‡</sup>                      | 0.039 ± 0.024            | 0.044 ± 0.027            | ns                              | 0.0435                        |
| C-peptide index ΔC <sub>30</sub> /ΔG <sub>30</sub> (ng/mL per mg/dL) <sup>‡</sup> | 0.066 ± 0.070            | 0.103 ± 0.075            | <.0001                          | <.0001                        |
| oDI 1/I <sub>F</sub> x ΔC <sub>30</sub> /ΔG <sub>30</sub> <sup>‡</sup>            | 0.002 ± 0.002            | 0.004 ± 0.004            | <.0001                          | <.0001                        |
| Total adiponectin (ng/mL) <sup>‡</sup>                                            | 4960 ± 2237 <sup>a</sup> | 5050 ± 2146 <sup>b</sup> | ns                              | ns                            |
| HMWA (ng/mL) <sup>‡</sup>                                                         | 2466 ± 1610 <sup>c</sup> | 2349 ± 1308 <sup>d</sup> | ns                              | ns                            |
| <b>Hispanic</b>                                                                   | <b>n=125</b>             | <b>n=153</b>             |                                 |                               |
| Age at randomization (yr)                                                         | 14.1 ± 2.0               | 13.8 ± 2.0               | ns                              | -                             |
| Female (%)                                                                        | 56.0%                    | 65.4%                    | ns                              | -                             |
| Months since diagnosis                                                            | 6 (4,12)                 | 5 (4,8)                  | 0.0055                          | -                             |
| BMI (kg/m <sup>2</sup> )                                                          | 34.8 ± 7.1               | 34.3 ± 7.7               | ns                              | -                             |
| BMI Z-score                                                                       | 2.24 ± 0.47              | 2.20 ± 0.46              | ns                              | -                             |
| Waist circumference (cm)                                                          | 110.5 ± 16.6             | 107.7 ± 15.6             | ns                              | -                             |
| HbA1c (%)                                                                         | 6.3 ± 0.8                | 5.7 ± 0.6                | <.0001                          | <.0001                        |
| Fasting glucose (mg/dL)                                                           | 120.3 ± 29.1             | 101.9 ± 17.4             | <.0001                          | <.0001                        |
| Fasting insulin (μU/mL) <sup>‡</sup>                                              | 28.6 ± 19.0              | 31.2 ± 21.1              | ns                              | ns                            |
| Fasting c-peptide (ng/mL) <sup>‡</sup>                                            | 3.9 ± 1.4                | 3.9 ± 1.5                | ns                              | ns                            |
| Insulin sensitivity [1/I <sub>F</sub> ] (mL/μU) <sup>‡</sup>                      | 0.050 ± 0.043            | 0.050 ± 0.034            | ns                              | ns                            |
| C-peptide index ΔC <sub>30</sub> /ΔG <sub>30</sub> (ng/mL per mg/dL) <sup>‡</sup> | 0.053 ± 0.050            | 0.098 ± 0.073            | <.0001                          | <.0001                        |
| oDI 1/I <sub>F</sub> x ΔC <sub>30</sub> /ΔG <sub>30</sub> <sup>‡</sup>            | 0.002 ± 0.002            | 0.004 ± 0.003            | <.0001                          | <.0001                        |
| Total adiponectin (ng/mL) <sup>‡</sup>                                            | 5742 ± 2526              | 5893 ± 2489              | ns                              | ns                            |
| HMWA (ng/mL) <sup>‡</sup>                                                         | 3062 ± 1877              | 3100 ± 1865              | ns                              | ns                            |
| <b>Non-Hispanic white</b>                                                         | <b>n=52</b>              | <b>n=90</b>              |                                 |                               |
| Age at randomization (yr)                                                         | 14.3 ± 2.2               | 14.0 ± 2.0               | ns                              | -                             |
| Female (%)                                                                        | 61.5%                    | 60.0%                    | ns                              | -                             |
| Months since diagnosis                                                            | 7 (4,12)                 | 5 (3,8)                  | 0.0029                          | -                             |



SUPPLEMENTARY DATA

|                                                                                      |               |               |        |        |
|--------------------------------------------------------------------------------------|---------------|---------------|--------|--------|
| BMI (kg/m <sup>2</sup> )                                                             | 34.8 ± 7.2    | 32.8 ± 6.8    | ns     | -      |
| BMI Z-score                                                                          | 2.21 ± 0.51   | 2.07 ± 0.51   | ns     | -      |
| Waist circumference (cm)                                                             | 110.9 ± 18.0  | 103.6 ± 14.7  | 0.0103 | -      |
| HbA1c (%)                                                                            | 6.3 ± 0.8     | 5.7 ± 0.6     | <.0001 | <.0001 |
| Fasting glucose (mg/dL)                                                              | 126.7 ± 27.7  | 104.3 ± 16.1  | <.0001 | <.0001 |
| Fasting insulin (μU/mL) <sup>‡</sup>                                                 | 29.5 ± 18.1   | 26.6 ± 23.3   | ns     | ns     |
| Fasting c-peptide (ng/mL) <sup>‡</sup>                                               | 4.1 ± 1.8     | 3.6 ± 1.5     | ns     | ns     |
| Insulin sensitivity<br>[1/I <sub>F</sub> ] (mL/μU) <sup>‡</sup>                      | 0.053 ± 0.040 | 0.051 ± 0.028 | ns     | ns     |
| C-peptide index<br>ΔC <sub>30</sub> /ΔG <sub>30</sub> (ng/mL per mg/dL) <sup>‡</sup> | 0.036 ± 0.031 | 0.082 ± 0.080 | <.0001 | <.0001 |
| oDI 1/I <sub>F</sub> × ΔC <sub>30</sub> /ΔG <sub>30</sub> <sup>‡</sup>               | 0.002 ± 0.003 | 0.003 ± 0.003 | <.0001 | <.0001 |
| Total adiponectin (ng/mL) <sup>‡</sup>                                               | 5847 ± 2100   | 5674 ± 2424   | ns     | ns     |
| HMWA (ng/mL) <sup>‡</sup>                                                            | 3212 ± 1586   | 3073 ± 1741   | ns     | ns     |

\* Data are presented as mean ± SD, % or median (first, third quartile).

<sup>†</sup> Unadjusted p-values were calculated from F-tests and/or Kruskal Wallis tests for continuous variables; and from chi-square tests for categorical variables. Adjusted p-values are adjusted by sex, baseline BMI, and age at randomization. Significant differences (P<0.05) among the 3 racial/ethnic groups for adiponectin were: (<sup>a</sup>) p=0.0032 within the failed category and (<sup>b</sup>) p=0.0127 within the 'did not fail' category. Significant differences among the 3 racial/ethnic groups for high-molecular weight adiponectin (HMWA) were: (<sup>c</sup>) p=0.0004 within the failed category and (<sup>d</sup>) p=0.0030 within the 'did not fail' category. For all 4 (<sup>a</sup>, <sup>b</sup>, <sup>c</sup>, and <sup>d</sup>), non-Hispanic blacks were different from Hispanics and non-Hispanic whites.

<sup>‡</sup> Variables were log-transformed prior to testing.

## SUPPLEMENTARY DATA

### Listing of the TODAY Study Group

The following individuals and institutions constitute the TODAY Study Group (\* indicates principal investigator or director):

**CLINICAL CENTERS** **Baylor College of Medicine:** S. McKay\*, M. Haymond\*, B. Anderson, C. Bush, S. Gunn, H. Holden, S.M. Jones, G. Jeha, S. McGirk, S. Thamocharan **Case Western Reserve University:** L. Cuttler\*, E. Abrams, T. Casey, W. Dahms (deceased), C. Ievers-Landis, B. Kaminski, M. Koontz, S. MacLeish, P. McGuigan, S. Narasimhan **Children's Hospital Los Angeles:** M. Geffner\*, V. Barraza, N. Chang, B. Conrad, D. Dreimane, S. Estrada, L. Fisher, E. Fleury-Milfort, S. Hernandez, B. Hollen, F. Kaufman, E. Law, V. Mansilla, D. Miller, C. Muñoz, R. Ortiz, A. Ward, K. Wexler, Y.K. Xu, P. Yasuda **Children's Hospital of Philadelphia:** L. Levitt Katz\*, R. Berkowitz, S. Boyd, B. Johnson, J. Kaplan, C. Keating, C. Lassiter, T. Lipman, G. McGinley, H. McKnight, B. Schwartzman, S. Willi **Children's Hospital of Pittsburgh:** S. Arslanian\*, F. Bacha, S. Foster, B. Galvin, T. Hannon, A. Kriska, I. Libman, M. Marcus, K. Porter, T. Songer, E. Venditti **Columbia University Medical Center:** R. Goland\*, D. Gallagher, P. Kringas, N. Leibel, D. Ng, M. Ovalles, D. Seidman **Joslin Diabetes Center:** L. Laffel\*, A. Goebel-Fabbri, M. Hall, L. Higgins, J. Keady, M. Malloy, K. Milaszewski, L. Rasbach **Massachusetts General Hospital:** D.M. Nathan\*, A. Angelescu, L. Bissett, C. Ciccarelli, L. Delahanty, V. Goldman, O. Hardy, M. Larkin, L. Levitsky, R. McEachern, D. Norman, D. Nwosu, S. Park-Bennett, D. Richards, N. Sherry, B. Steiner **Saint Louis University:** S. Tollefsen\*, S. Carnes, D. Dempsher, D. Flomo, T. Whelan, B. Wolff **State University of New York Upstate Medical University:** R. Weinstock\*, D. Bowerman, S. Bristol, J. Bulger, J. Hartsig, R. Izquierdo, J. Kearns, R. Saletsky, P. Trief **University of Colorado Denver:** P. Zeitler\* (Steering Committee Chair), N. Abramson, A. Bradhurst, N. Celona-Jacobs, J. Higgins, M. Kelsey, G. Klingensmith, K. Nadeau, T. Witten **University of Oklahoma Health Sciences Center:** K. Copeland\* (Steering Committee Vice-Chair), E. Boss, R. Brown, J. Chadwick, L. Chalmers, S. Chernausek, A. Hebensperger, C. Macha, R. Newgent, A. Nordyke, D. Olson, T. Poulsen, L. Pratt, J. Preske, J. Schanuel, S. Sternlof **University of Texas Health Science Center at San Antonio:** J. Lynch\*, N. Amodei, R. Barajas, C. Cody, D. Hale, J. Hernandez, C. Ibarra, E. Morales, S. Rivera, G. Rupert, A. Wauters **Washington University in St Louis:** N. White\*, A. Arbeláez, D. Flomo, J. Jones, T. Jones, M. Sadler, M. Tanner, A. Timpson, R. Welch **Yale University:** S. Caprio\*, M. Grey, C. Guandalini, S. Lavietes, P. Rose, A. Syme, W. Tamborlane

**COORDINATING CENTER** **George Washington University Biostatistics Center:** K. Hirst\*, S. Edelstein, P. Feit, N. Grover, C. Long, L. Pyle

**PROJECT OFFICE** **National Institute of Diabetes and Digestive and Kidney Diseases:** B. Linder\*

**CENTRAL UNITS** **Central Blood Laboratory (Northwest Lipid Research Laboratories, University of Washington):** S.M. Marcovina\*, J. Harting **DEXA Reading Center (University of California at San Francisco):** J. Shepherd\*, B. Fan, L. Marquez, M. Sherman, J. Wang **Diet Assessment Center (University of South Carolina):** M. Nichols\*, E. Mayer-Davis, Y. Liu **Echocardiogram Reading Center (Johns Hopkins University):** J. Lima\*, S. Gidding, J. Puccella, E. Ricketts **Fundus Photography Reading Center (University of Wisconsin):** R. Danis\*, A. Domalpally, A. Goulding, S. Neill, P. Vargo **Lifestyle Program Core (Washington University):** D. Wilfley\*, D. Aldrich-Rasche, K. Franklin, C. Massmann, D. O'Brien, J. Patterson, T. Tibbs, D. Van Buren

**OTHER** **Hospital for Sick Children, Toronto:** M. Palmert **Medstar Research Institute, Washington DC:** R. Ratner **Texas Tech University Health Sciences Center:** D. Dremaine **University of Florida:** J. Silverstein
